# Supplementary material for: YTHDF1 loss in dendritic cells potentiates radiation-induced antitumor immunity via STING-dependent type I IFN production
Source: JCI journal article supplement (doi:10.1172/jci181612), 2024-09-26
Supplement: sd1 [file 1]

## Supplemental Figures and Legends

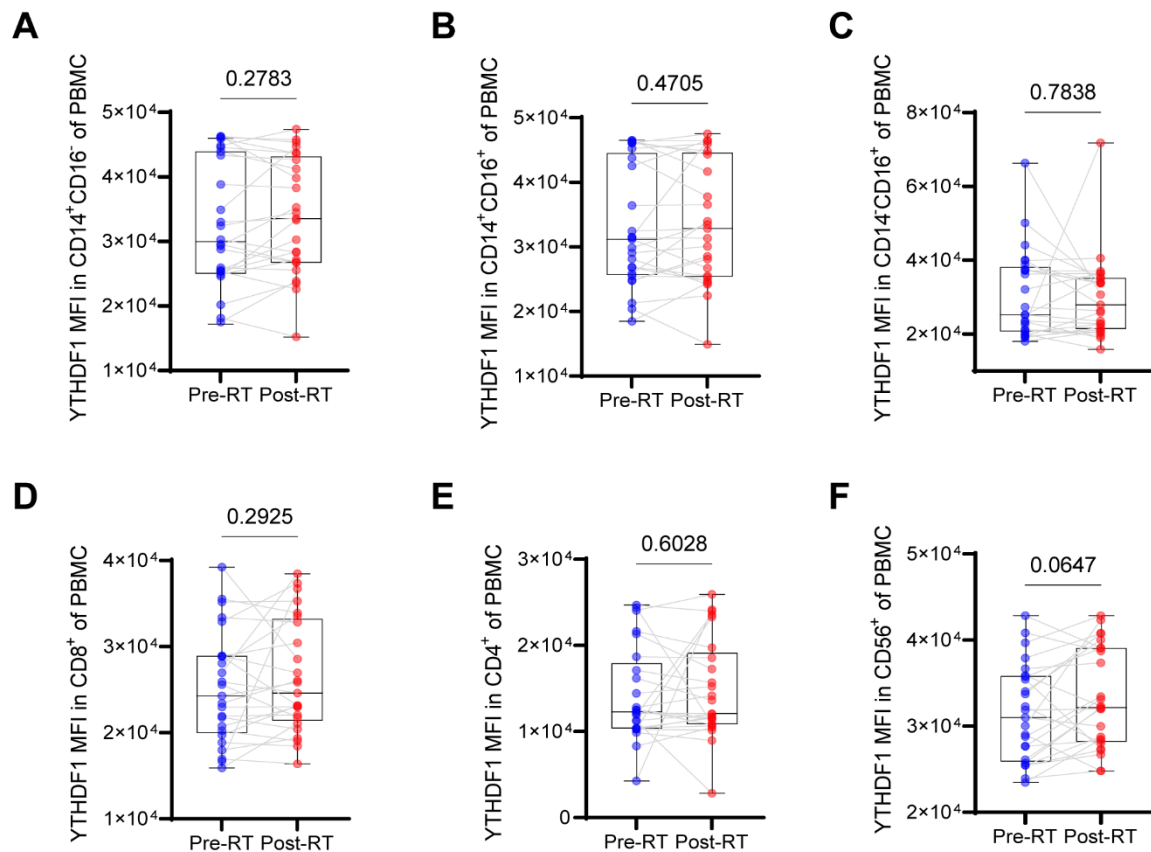

**Supplemental Figure 1. Radiotherapy does not significantly increase YTHDF1 expression in monocytes, T cells and NK cells of patient PBMCs.**

(A-F). Flow cytometry analysis of YTHDF1 expression in PBMCs from patients with metastatic NSCLC treated with SBRT in the following populations (n = 25): classical monocytes (CD14<sup>+</sup>CD16<sup>-</sup>) (A); intermediate monocytes (CD14<sup>+</sup>CD16<sup>+</sup>) (B); non-classical monocytes (CD14<sup>-</sup>CD16<sup>+</sup>) (C); CD8<sup>+</sup> T cells (CD3<sup>+</sup>CD8<sup>+</sup>) (D); CD4<sup>+</sup> T cells (CD3<sup>+</sup>CD4<sup>+</sup>) (E); and NK cells (CD3<sup>-</sup>CD56<sup>+</sup>) (F). Two-sided paired Student's *t*-test (A-F).

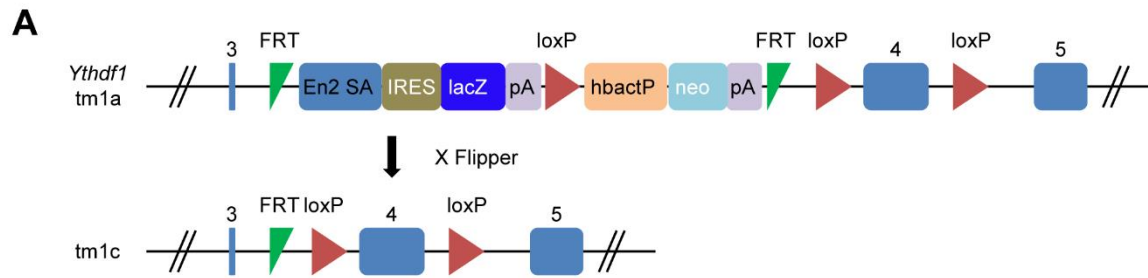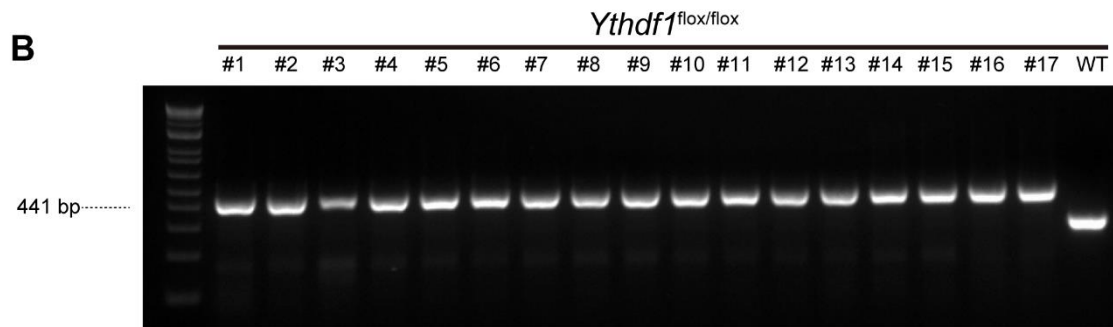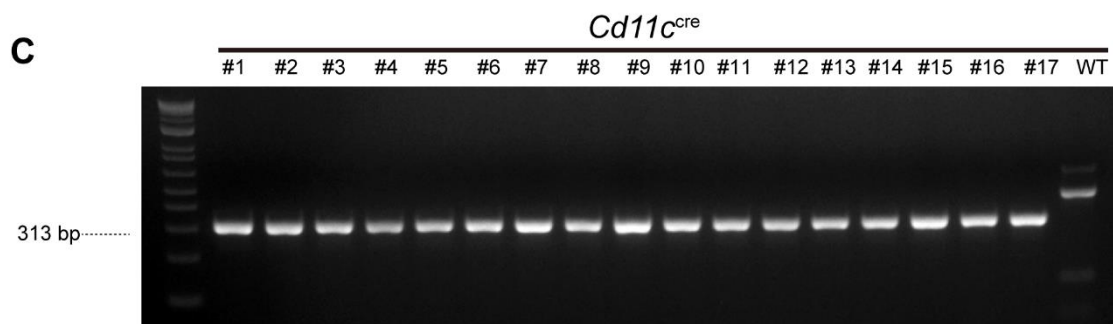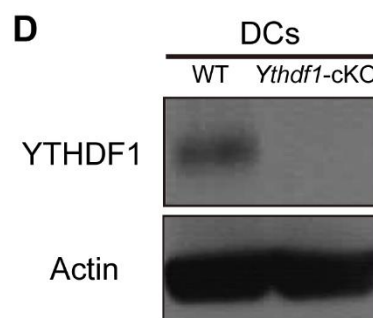

**Supplemental Figure 2. Generation of mice with DC-specific *Ythdf1* deletion.**

**(A).** The gene-targeting strategy for generating *Ythdf1*<sup>flox/flox</sup> mice.

**(B and C).** PCR products from *Ythdf1*<sup>flox/flox</sup> mice **(B)** and *Cd11c*<sup>Cre</sup> mice **(C)**.

**(D).** Western blot analysis of the YTHDF1 expression in spleen DCs from WT and *Ythdf1*-cKO

mice.

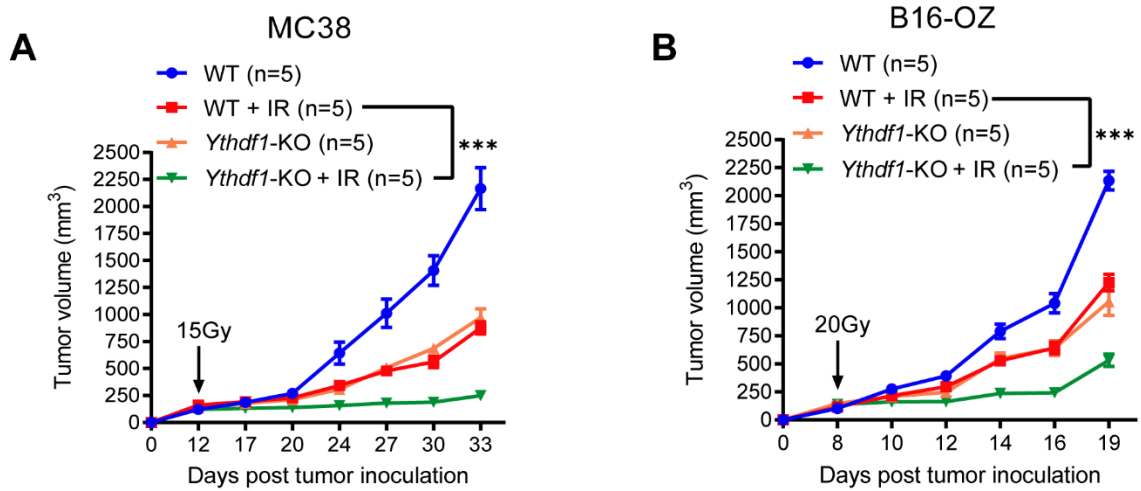

**Supplemental Figure 3. *Ythdf1* depletion enhances the antitumor response to radiotherapy. (A and B).** WT and *Ythdf1*-KO mice were injected subcutaneously with MC38 (A) and B16-OZ (B) cells. Tumor-bearing mice were treated with local IR (one dose) when tumor volume reached 100-200 mm<sup>3</sup>. Tumor growth was monitored after IR.

Data are represented as mean  $\pm$  SEM. Data are representative of three independent experiments. Two-way ANOVA with Tukey's multiple comparison test. \*\*\* $P < 0.001$ .

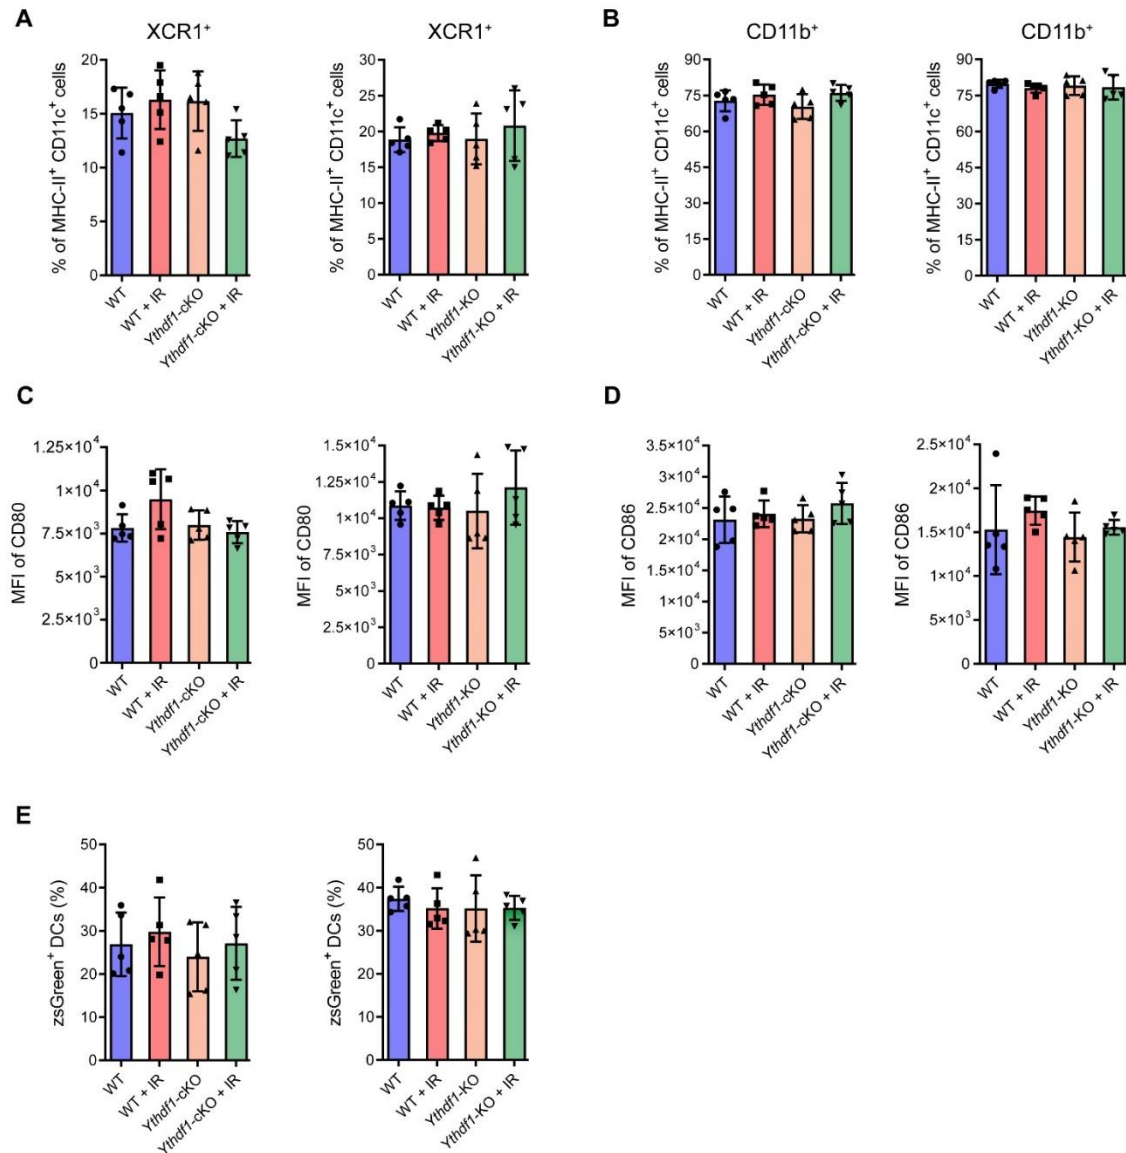

**Supplemental Figure 4. IR has no significant effect on the subpopulation composition, co-stimulatory molecule expression, and phagocytic activity of tumor-infiltrating DCs in *Ythdf1*-cKO and *Ythdf1*-KO mice.**

**(A-E).** *Ythdf1*-cKO and *Ythdf1*-KO mice were injected subcutaneously with B16-OZ cells. Tumor-bearing mice were treated with local IR (20 Gy, one dose) when tumor volume reached 100-200 mm<sup>3</sup>. The following markers were detected via flow cytometry on day 5 after IR (n = 5).

DC1 (CD45<sup>+</sup>F4/80<sup>+</sup>CD11c<sup>+</sup>MHC-II<sup>+</sup>CD11b<sup>+</sup>XCR1<sup>+</sup>) **(A)** and DC2 (CD45<sup>+</sup>F4/80<sup>+</sup>CD11c<sup>+</sup>MHC-II<sup>+</sup>CD11b<sup>+</sup>XCR1<sup>-</sup>) **(B)** subpopulations of tumor-infiltrating DCs. The expression of CD80 **(C)** and CD86 **(D)** of tumor-infiltrating DCs (CD45<sup>+</sup>F4/80<sup>+</sup>CD11c<sup>+</sup>MHC-II<sup>+</sup>). The phagocytosis of tumor-infiltrating DCs were detected by the expression of zsGreen **(E)**.

Data are represented as mean ± SEM. Data are representative of two or three independent experiments. One-way ANOVA with Tukey's multiple comparison test (A-E).

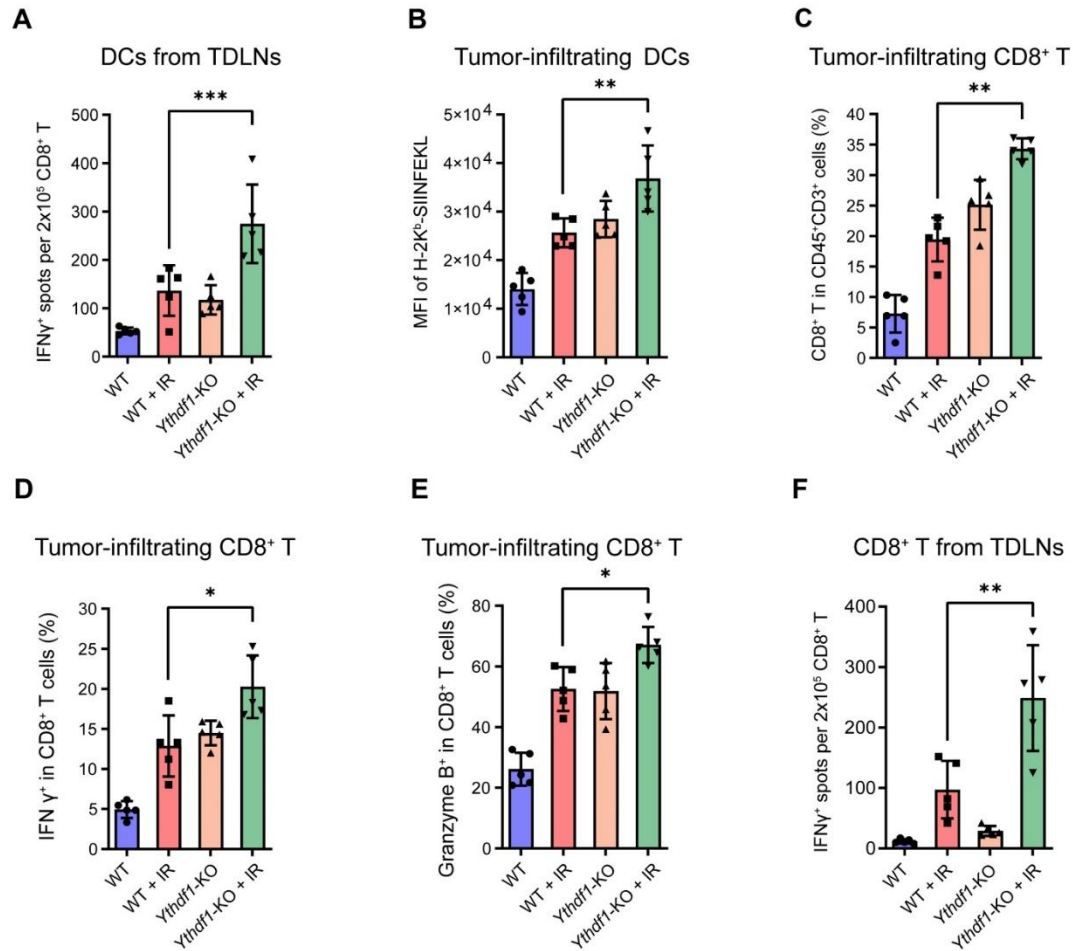

**Supplemental Figure 5. *Ythdf1* whole body deletion enhances the cross-priming capacity of DCs in the context of IR.**

**(A and B).** WT and *Ythdf1*-KO mice were injected subcutaneously with B16-OZ cells. Tumor-bearing mice were treated with local IR (20 Gy, one dose) when tumor volume reached 100-200 mm $^3$ . On day 5 after IR, CD11c $^+$  cells from TDLNs were isolated and co-cultured with OT-I T cells for 3 days, and then IFN $\gamma$ -producing cells were enumerated by ELISPOT (n = 5) **(A)**; in tumor-infiltrating DCs (CD45 $^+$ F4/80 $^+$ CD11c $^+$ MHC-II $^+$ ), the formation of H-2K $^b$ -SIINFEKL was detected via flow cytometry (n = 5) **(B)**.

**(C-E).** On day 8 post-IR, the proportions of CD8 $^+$  T cells (CD45 $^+$ CD3 $^+$ CD8 $^+$ ) **(C)**, IFN $\gamma$  **(D)**, and Granzyme B **(E)** in CD8 $^+$  T cells were detected via flow cytometry (n = 5).

**(F).** On day 8 post-IR, CD8 $^+$  T cells were isolated from TDLNs. Tumor antigen-specific CD8 $^+$  T-cell function was measured via ELISPOT by co-culturing CD8 $^+$  T cells with 5  $\mu$ g/ml OT-I peptide (n = 5).

Data are represented as mean  $\pm$  SEM. Data are representative of two or three independent experiments. One-way ANOVA with Tukey's multiple comparison test (A-F). \* $P$  < 0.05, \*\* $P$  < 0.01, \*\*\* $P$  < 0.001.

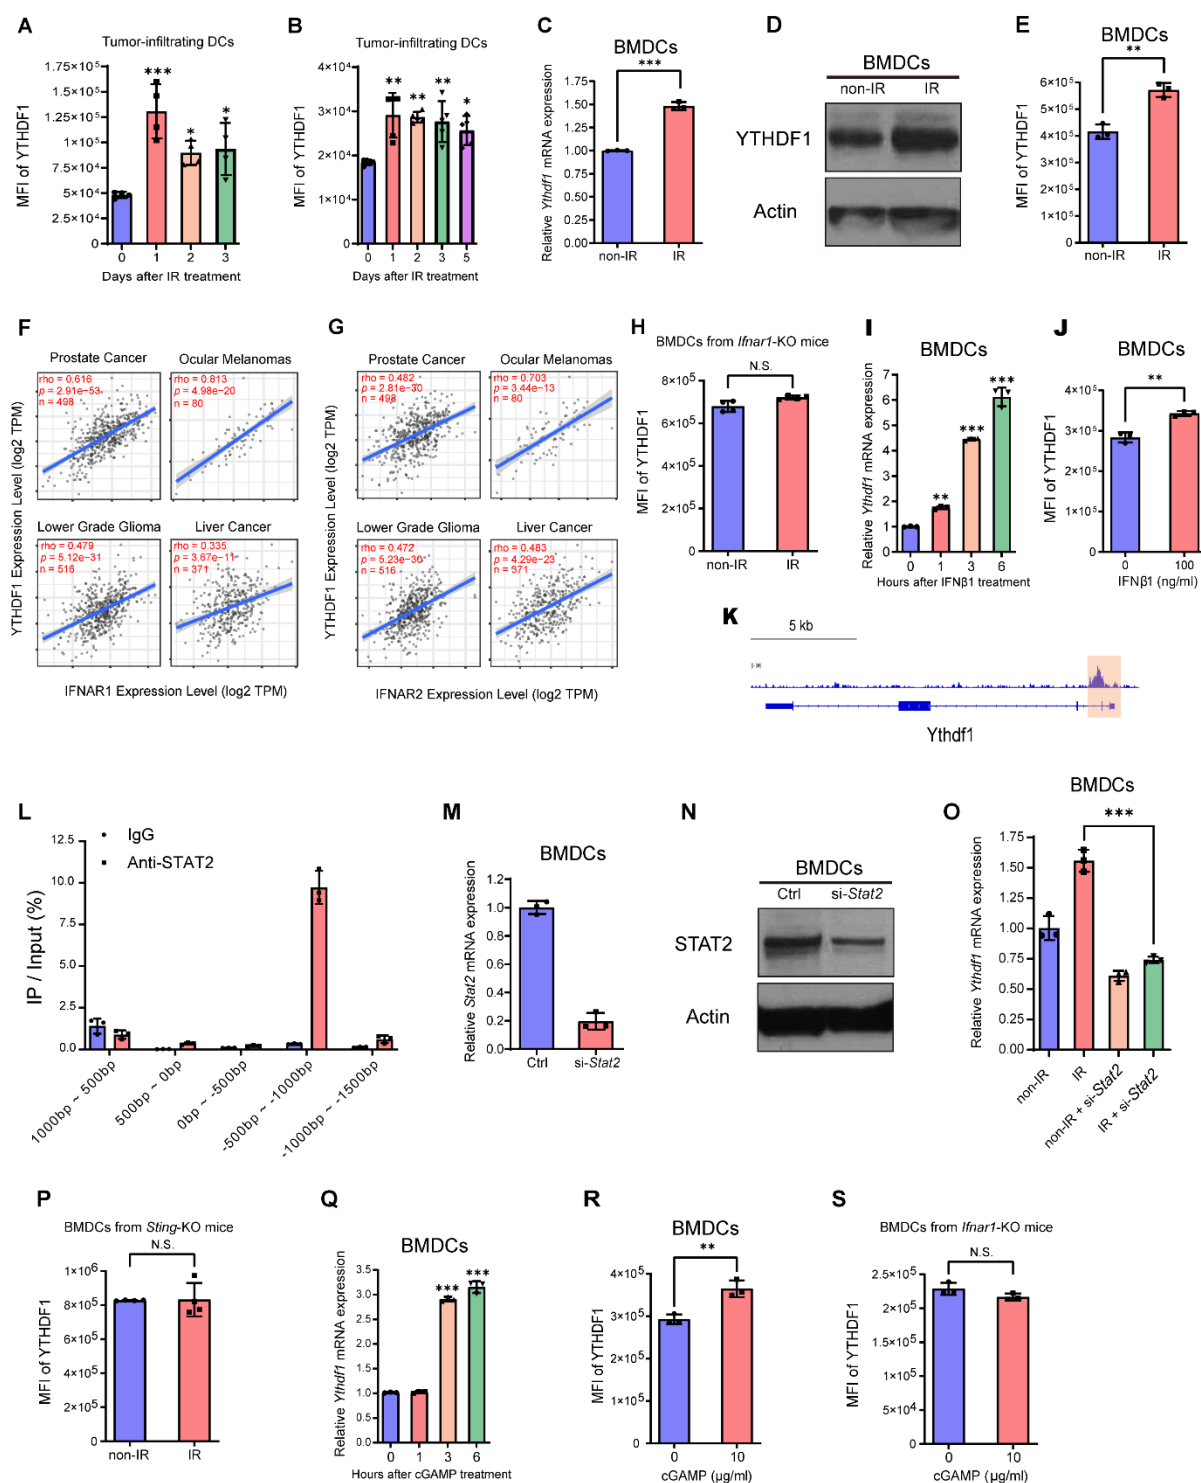

**Supplemental Figure 6. IR induces YTHDF1 expression in DCs via STING-IFN-I signaling.**

**(A).** B16-OZ-bearing mice were treated with local IR (20 Gy, one dose) and the expression of YTHDF1 of tumor-infiltrating DCs (CD45<sup>+</sup>F4/80<sup>+</sup>CD11c<sup>+</sup>MHC-II<sup>+</sup>) was detected at the indicated times after IR via flow cytometry (n = 5).

**(B).** B16-OZ-bearing mice were treated with local fractionated radiotherapy (5 Gy in 5 consecutive days) and the expression of YTHDF1 of tumor-infiltrating DCs (CD45<sup>+</sup>F4/80<sup>+</sup>CD11c<sup>+</sup>MHC-II<sup>+</sup>) was

detected at the indicated times after IR via flow cytometry (n = 5).

**(C-E).** BMDCs from WT mice were co-cultured with 40 Gy-pretreated B16-OZ or nonirradiated-B16-OZ cells, and the purified CD11c<sup>+</sup> cells were collected to detect *Ythdf1* mRNA expression by qPCR (co-cultured for 3 h, n = 3) **(C)**, and YTHDF1 protein expression by western blot (co-cultured for 24 h) **(D)**, and flow cytometry (co-cultured for 24 h, n = 3) **(E)**.

**(F and G).** The correlation between IFNAR1 **(F)** or IFNAR2 **(G)** and YTHDF1 expression was evaluated by Spearman's method.

**(H).** BMDCs from *Ifnar1*-KO mice were cultured with 40 Gy-pretreated B16-OZ or nonirradiated-B16-OZ cells for 24 h. The expression of YTHDF1 in BMDCs was then detected via flow cytometry (n = 4).

**(I).** BMDCs from WT mice were treated with 100 ng/ml IFN $\beta$ 1. BMDCs cells were then collected at the indicated times to measure *Ythdf1* expression by qPCR (n = 3).

**(J).** BMDCs from WT mice were treated with 100 ng/ml IFN $\beta$ 1 for 24 h. The expression of YTHDF1 was then detected by flow cytometry (n = 3).

**(K).** Profile of STAT2 binding (GSE115435) at the promoter region of *Ythdf1* in bone marrow-derived macrophages.

**(L).** STAT2 binding to the promoter region of *Ythdf1* was determined by ChIP-qPCR (n = 3).

**(M and N).** BMDCs were transfected with si-RNA targeting *Stat2*. Cells were then collected to detect *Stat2* mRNA expression by qPCR (24 h after transfection, n = 3) **(M)**, and YTHDF1 protein expression by western blot (48 h after transfection) **(N)**.

**(O).** BMDCs with STAT2 knockdown were co-cultured with 40 Gy-pretreated B16-OZ or nonirradiated-B16-OZ cells, and the purified CD11c<sup>+</sup> cells were collected to detect *Ythdf1* mRNA expression by qPCR (co-cultured for 3 h, n = 3).

**(P).** BMDCs from *Sting*-KO mice were co-cultured with 40 Gy-pretreated B16-OZ or nonirradiated-B16-OZ cells for 24 h. The expression of YTHDF1 was then detected by flow cytometry (n = 4).

**(Q).** BMDCs from WT mice were treated with 10  $\mu$ g/ml 2'3'-cGAMP. BMDCs cells were then collected at the indicated times to measure *Ythdf1* expression by qPCR (n = 3).

**(R).** BMDCs from WT mice were treated with 10  $\mu$ g/ml 2'3'-cGAMP for 24 h. The expression of YTHDF1 was then detected by flow cytometry (n = 3).

**(S).** BMDCs from *Ifnar1*-KO mice were treated with 10  $\mu$ g/ml 2'3'-cGAMP for 24 h. The expression of YTHDF1 was then detected by flow cytometry (n = 3).

Data are represented as mean  $\pm$  SEM. Data are representative of two or three independent experiments (A-E, H-J, L-S). Two-sided unpaired Student's *t*-tests (C, E, H, J, P, R and S), one-way ANOVA with Tukey's multiple comparison test (A, B, I, O and Q). N.S. = not significant, \**P* < 0.05, \*\**P* < 0.01, \*\*\**P* < 0.001.

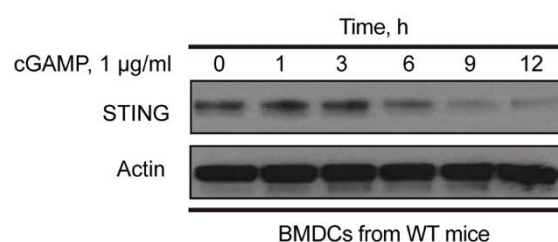

**Supplemental Figure 7. 2'3'-cGAMP induces STING degradation in BMDCs.**



BMDCs from WT mice were treated with 2'3'-cGAMP at the indicated times and the expression of STING was detected by western blot. Data are representative of three independent experiments.

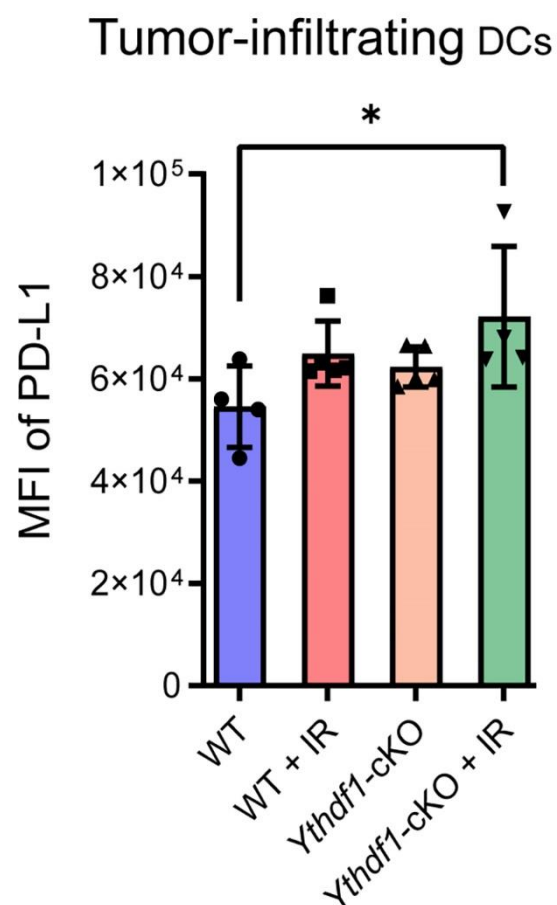

**Supplemental Figure 8. The PD-L1 expression of tumor-infiltrating DCs is increased in *Ythdf1*-cKO+IR mice.**

WT and *Ythdf1*-cKO mice were injected subcutaneously with B16-OZ cells. Tumor-bearing mice were treated with local IR (20 Gy, one dose) when tumor volume reached 100-200 mm<sup>3</sup>. The expression of PD-L1 on tumor-infiltrating DCs (CD45<sup>+</sup>F4/80<sup>+</sup>CD11c<sup>+</sup>MHC-II<sup>+</sup>) was detected via flow cytometry on day 5 after IR (n = 4 or 5).

Data are represented as mean ± SEM. One-way ANOVA with Tukey's multiple comparison test.

\**P* < 0.05.
